# Supplementary material
Source: MDPI journal article supplement (https://www.mdpi.com/1996-1073/16/4/2077)
Supplement: s1 [file s1]

**Table S1.** Data on energy consumption of public lightning system in LSGs in Serbia. Source: Information system for energy management of the Republic of Serbia, 2022, <https://www.sem.mre.gov.rs>.

| <b>LSG</b>          | <b>2019</b> | <b>2020</b> | <b>2021</b> |
|---------------------|-------------|-------------|-------------|
| <i>Bajina Bašta</i> | 1.011       | 802         | 985         |
| <i>Vlasotince</i>   | 504         | 483         | 494         |
| <i>Vrbas</i>        | 3.378       | 2.578       | 2.026       |
| <i>Ivanjica</i>     | 1.020       | 1.056       | 948         |
| <i>Kragujevac</i>   |             |             |             |
| <i>Kraljevo</i>     |             |             |             |
| <i>Leskovac</i>     | 7.445       | 7.301       |             |
| <i>Niš</i>          | 13.858      | 14.381      |             |
| <i>Pirot</i>        | 2.788       | 2.808       | 1.972       |
| <i>Preševo</i>      |             |             |             |
| <b>Priboj</b>       | <b>929</b>  | <b>684</b>  | <b>543</b>  |
| <i>Senta</i>        | 729         | 726         | 739         |
| <i>Subotica</i>     | 9.070       | 7.489       | 8.138       |
| <i>Surdulica</i>    | 961         | 828         |             |
| <i>Temerin</i>      | 1.981       | 1.110       | 838         |
| <i>Ćuprija</i>      | 2.967       | 2.940       | 3.196       |
| <i>Šid</i>          |             |             | 1.127       |
