# Supplementary material
Source: MDPI journal article supplement (https://www.mdpi.com/1996-1073/16/4/2077)
Supplement: s1 [file s1]

## Detailed list of other sources

**Table S2.** List of interviewees, strategic meetings, events, and study visits related to direct observation of the case development.

| INTERVIEWEE/DISCUSSANT                                                                                                                            | INSTITUTION                                                                                                              | DATE                                                                                                                                                                                      |
|---------------------------------------------------------------------------------------------------------------------------------------------------|--------------------------------------------------------------------------------------------------------------------------|-------------------------------------------------------------------------------------------------------------------------------------------------------------------------------------------|
| Leader of project 'Promoting the renewable energy sources at local level'                                                                         | Faculty of Forestry, University of Belgrade, supported by UNDP County Office in Belgrade, Serbia                         | November 20, 2009                                                                                                                                                                         |
| Advisor in the Forestry Directorate                                                                                                               | Ministry for Agriculture, Water Management and Forestry of the Republic of Serbia                                        | November 22, 2009                                                                                                                                                                         |
| Head of Forestry Directorate                                                                                                                      | Ministry for Agriculture, Water Management and Forestry of the Republic of Serbia                                        | October 25, 2009                                                                                                                                                                          |
| Assistant Minister responsible for Renewable Energy Sources                                                                                       | Ministry of Energy and Mining of the Republic of Serbia                                                                  | February 25, 2009                                                                                                                                                                         |
| Leading country expert on biomass and leader of the project 'Prefeasibility assessment of biomass district heating system applications in Serbia' | International Resource Group sponsored by USAID in Serbia                                                                | November 14, 2011; April 8, 2017; December 4, 2020                                                                                                                                        |
| Lead Engineer                                                                                                                                     | District Heating Utility of the Municipality of Priboj                                                                   | November 14, 2011                                                                                                                                                                         |
| Director                                                                                                                                          | Social Care Center of the Municipality of Priboj                                                                         | September 29, 2014; November 25, 2021                                                                                                                                                     |
| Director                                                                                                                                          | District Heating Utility of the Municipality of Priboj                                                                   | September 29, 2014                                                                                                                                                                        |
| Mayor                                                                                                                                             | Municipality of Priboj                                                                                                   | 25 September 2018<br>October 28, 2021                                                                                                                                                     |
| Deputy Mayor                                                                                                                                      | Municipality of Priboj                                                                                                   | March 24, 2015; November 18, 2016; May 16 and 17, 2017; September 25, 2018; February 27 and 28, 2019; 20 October 2020; March 5 and May 25, October 28, 2021; March 1, 2022, July 13, 2022 |
| Energy Manager                                                                                                                                    | Municipality of Priboj                                                                                                   | February 21, 2018; February 27 and 28, 2019                                                                                                                                               |
| Director                                                                                                                                          | District heating utility (biomass based) of the Municipality of Priboj                                                   | December 23, 2021; October 28, 2021; March 24 and 25, 2022                                                                                                                                |
| STRATEGIC MEETINGS                                                                                                                                | INSTITUTIONS                                                                                                             | DATE                                                                                                                                                                                      |
| Director                                                                                                                                          | Public Investment Office of the Republic of Serbia                                                                       | 25 September 2018; March 5, 2020                                                                                                                                                          |
| Advisor                                                                                                                                           | Public Investment Office of the Republic of Serbia                                                                       | March 5, 2020                                                                                                                                                                             |
| Team Leader of project 'Development of a Sustainable Bioenergy Market in Serbia'                                                                  | German development agency (The Deutsche Gesellschaft für Internationale Zusammenarbeit GmbH), Office in Belgrade, Serbia | October 5, 2016                                                                                                                                                                           |
| Deputy Director                                                                                                                                   | KfW Development Bank, Serbia                                                                                             | October 17, 2019                                                                                                                                                                          |

|                                                                                                                                                                                                                                     |                                                                                                                          |                                                |
|-------------------------------------------------------------------------------------------------------------------------------------------------------------------------------------------------------------------------------------|--------------------------------------------------------------------------------------------------------------------------|------------------------------------------------|
| Principal Fund Manager – Renewable District Energy                                                                                                                                                                                  | European Bank for Reconstruction, Office in Serbia                                                                       | November 16, 2021                              |
| Program manager                                                                                                                                                                                                                     | German development agency (The Deutsche Gesellschaft für Internationale Zusammenarbeit GmbH), Office in Belgrade, Serbia | June 3, 2020                                   |
| Public Policy Coordinator                                                                                                                                                                                                           | Belgrade Open School                                                                                                     | December 20, 2020                              |
| Program Coordinator                                                                                                                                                                                                                 | Belgrade Fund for Political Excellence                                                                                   | May 5, 2021                                    |
| <b>MULTI-STAKEHOLDER EVENTS</b>                                                                                                                                                                                                     | <b>LOCATION</b>                                                                                                          | <b>DATE</b>                                    |
| Parliamentary hearing on opportunities for efficient use of biomass for energy in the Republic of Serbia – Committee for Economy, Regional Development, Trade, Tourism and Energy                                                   | Parliament of the Republic of Serbia                                                                                     | March 24, 2015                                 |
| Workshop on municipal district heating options: Presentation of the prefeasibility study for fuel switch of LSGs in Serbia including Priboj, supported by USAID                                                                     | Obrenovac, Serbia                                                                                                        | November 14, 2012                              |
| 8 International energy and investment days, organized Novi Sad Fair, Provincial Secretariat for Energy, Construction and Transport, City of Novi Sad and in partnership with RES Foundation                                         | Novi Sad, Serbia                                                                                                         | February 27 and 28, 2019                       |
| 9 <sup>th</sup> International energy and investment days, organized Novi Sad Fair, Provincial Secretariat for Energy, Construction and Transport, City of Novi Sad and in partnership with RES Foundation                           | Novi Sad, Serbia                                                                                                         | February 26 and 27, 2020                       |
| Panel discussion within the framework of international energy fair ‘Energy transition: collision and cohesion’ organized by City of Novi Sad and in partnership with RES Foundation and Municipality of Priboj                      | Priboj, Serbia                                                                                                           | March 5, 2021                                  |
| 10 <sup>th</sup> International energy and investment days, organized Novi Sad Fair, Provincial Secretariat for Energy, Construction and Transport, City of Novi Sad and in partnership with RES Foundation                          | Novi Sad                                                                                                                 | November 3 and 4, 2021                         |
| Launch of Network of Good Energy organized by Belgrade Open School, Ecological Movement of Vojvodina and RES Foundation                                                                                                             | Sremski Karlovci, Serbia                                                                                                 | October 3, 2017                                |
| Thematic workshop 1 for six LSGs (including Priboj) of the project ‘Improving the public support for reduction of air-pollution from individual sources’, supported by Balkan Trust for Democracy, implemented by RES Foundation    | Zlatibor                                                                                                                 | September 16 and 17, 2021                      |
| Thematic workshop 2 for six LSGs (including Priboj) of the project Improving the public support for reduction of air-pollution from individual sources’, supported by Balkan Trust for Democracy, implemented by RES Foundation     | Beograd                                                                                                                  | December 23, 2021                              |
| Thematic workshop 2 for twenty LSGs (including Priboj) of the project ‘Improving the public support for reduction of air-pollution from individual sources’, supported by Balkan Trust for Democracy, implemented by RES Foundation | Vrnjačka Banja                                                                                                           | March 24 and 25, 2022                          |
| Two conferences of the GIZ Project ‘Development of a Sustainable Bioenergy Market in Serbia’:                                                                                                                                       | Belgrade, Serbia                                                                                                         | November 24 and 25, 2015;<br>November 18, 2016 |

|                                                                                                                                        |                 |                          |
|----------------------------------------------------------------------------------------------------------------------------------------|-----------------|--------------------------|
| 1. How to Strengthen the usage of bioenergy in the Balkans Region'<br>2. 'Access to affordable and sustainable bioenergy'              |                 |                          |
| <b>FIELD VISITS</b>                                                                                                                    | <b>LOCATION</b> | <b>DATE</b>              |
| Accession of the Priboj to the EU Covenant of Mayors and networking event of the Caravan for Climate of the French Institute in Serbia | Priboj, Serbia  | September 25, 2018       |
| Opening of biomass district heating plant                                                                                              | Priboj, Serbia  | October 28, 2021         |
| Visit of Network of Good Energy                                                                                                        | Priboj, Serbia  | February 21 and 22, 2018 |
